# Supplementary material for: Modification of Fear Memory by Pharmacological and Behavioural Interventions during Reconsolidation
Source: PubMed Central journal article supplement (PMC4990323; doi:10.1371/journal.pone.0161044), 2016-08-18
Supplement: pone.0161044.s003.pdf [file pone.0161044.s003.pdf]

## Supplemental Information

### S1 Table. Systolic, and diastolic blood pressure, and heart rate.

Mean values (SD) of systolic and diastolic blood pressure (in mmHg) and HR pre and 90 minutes post propranolol administration during memory reactivation on day 2.

---

|                    | <b>Pre-pill intake</b> | <b>Post-pill intake</b> |
|--------------------|------------------------|-------------------------|
| <hr/>              |                        |                         |
| <i>Placebo</i>     |                        |                         |
| Systolic BP        | 109.16 (13.15)         | 111.68 (14.02)          |
| Diastolic BP       | 66.21 (6.47)           | 69.16 (10.99)           |
| HR                 | 77.89 (12.17)          | 67.89 (10.47)           |
| <br>               |                        |                         |
| <i>Propranolol</i> |                        |                         |
| Systolic BP        | 108.16 (12.79)         | 106.47 (13.62)          |
| Diastolic BP       | 65.94 (7.02)           | 68.73 (12.38)           |
| HR                 | 79.89 (12.27)          | 64.37 (8.19)            |

---
